# Supplementary material for: Neuronal Lipoprotein Lipase Deficiency Alters Neuronal Function and Hepatic Metabolism
Source: Preprints.org preprint supplement (doi:10.20944/preprints202009.0484.v1), 2020-09-20
Supplement: Supplementary file 1 [file supplementary]

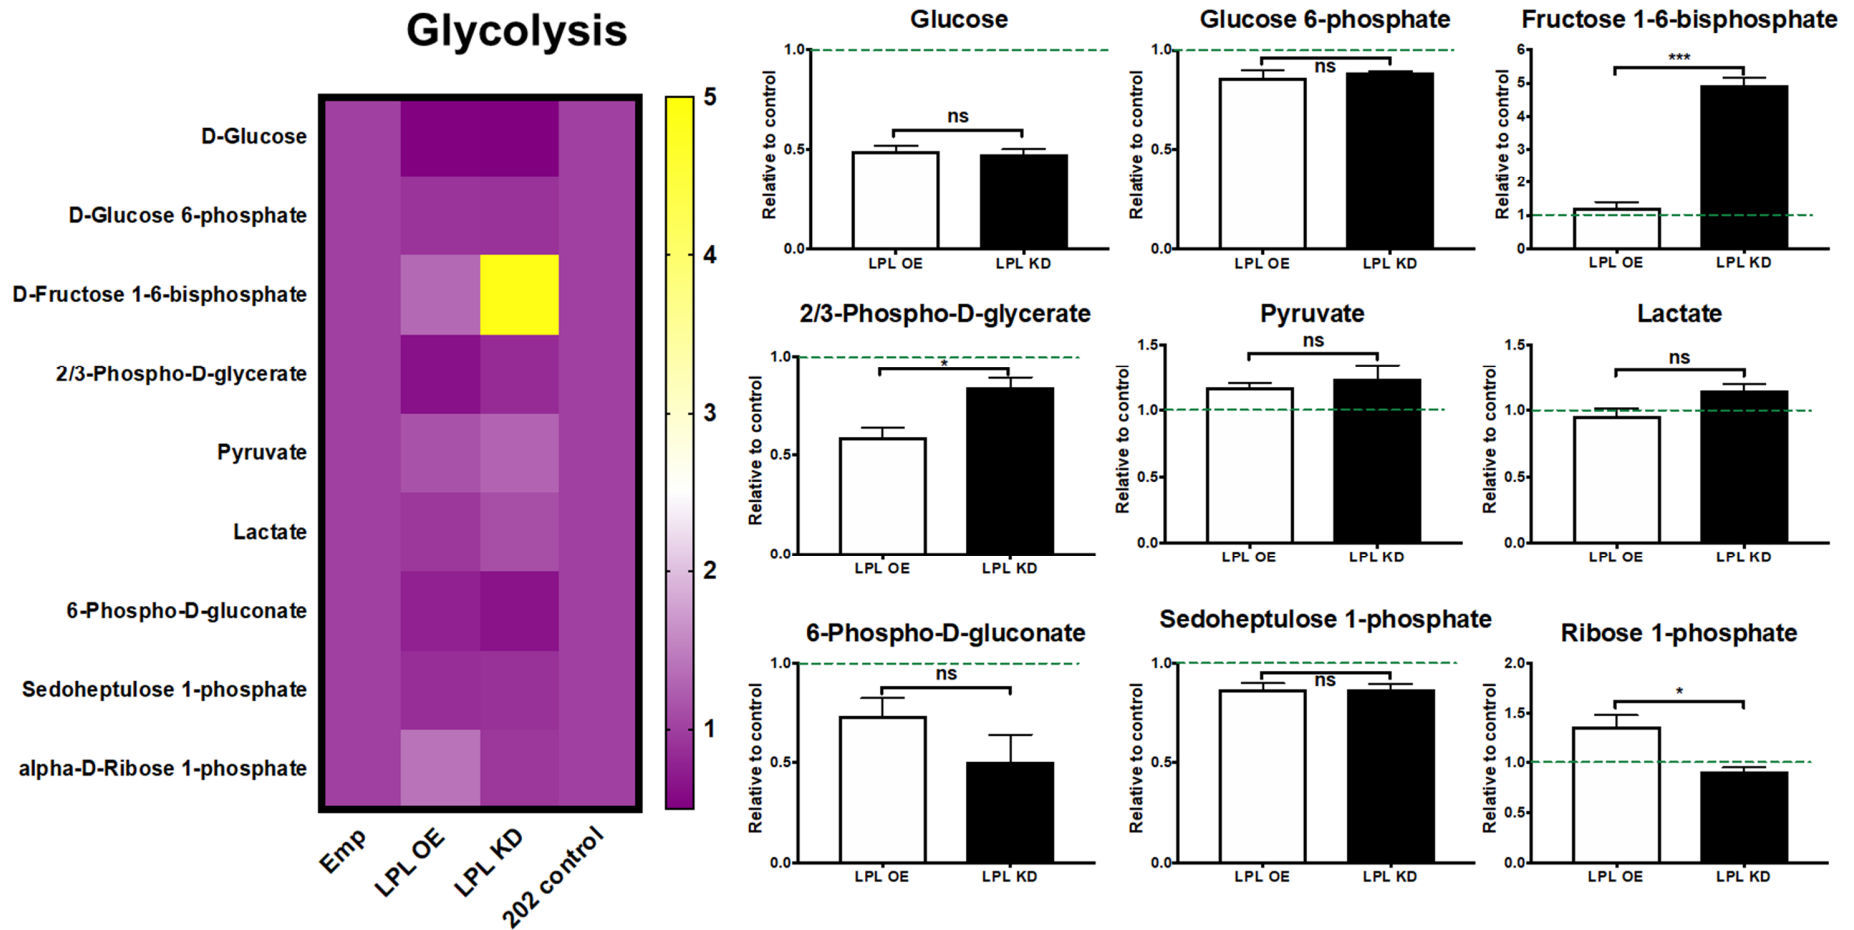

**Supplemental Figure 1.** Analysis of metabolites in the glycolysis pathway in immortalized hypothalamic neurons either over expressing lipoprotein Lipase (LPL) (LPL OE) versus Empty vector control cells (Emp), or in LPL knock-down cells (LPL KD) versus 202 control cells (202 Control).

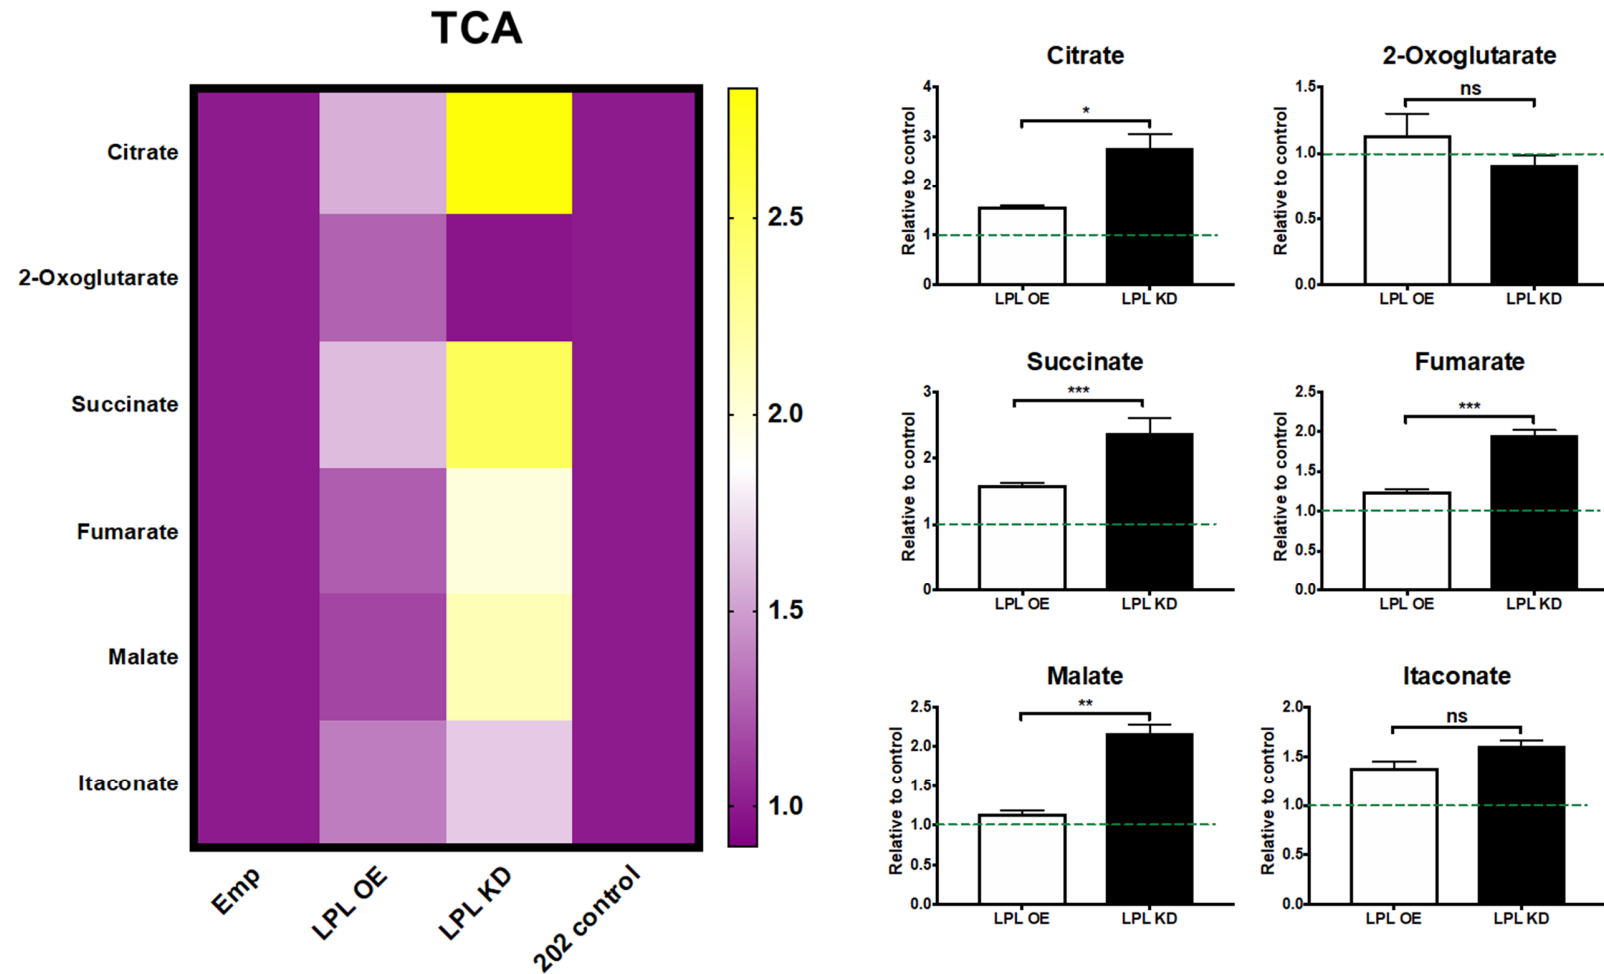

**Supplemental Figure 2.** Analysis of metabolites in the TCA pathway in immortalized hypothalamic neurons either over expressing lipoprotein Lipase (LPL) (LPL OE) versus Empty vector control cells (Emp), or in LPL knock-down cells (LPL KD) versus 202 control cells (202 Control).

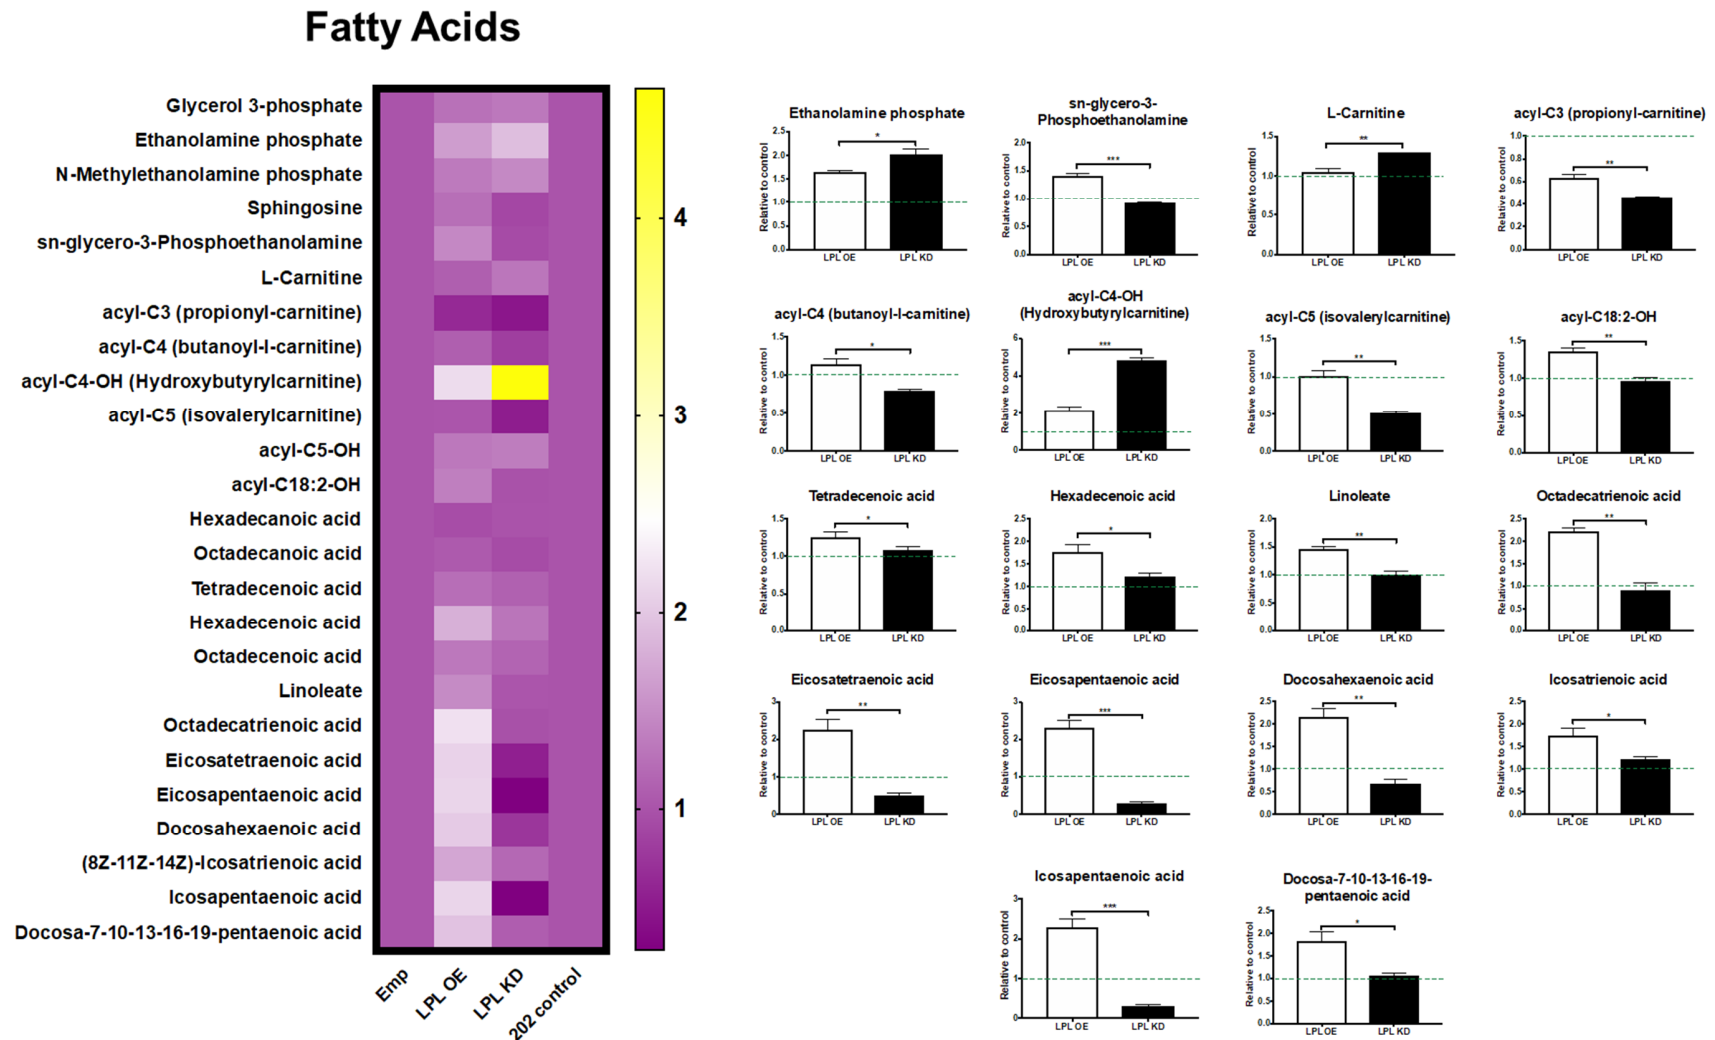

**Supplemental Figure 3.** Analysis of fatty acid metabolites in immortalized hypothalamic neurons either over expressing lipoprotein Lipase (LPL) (LPL OE) versus Empty vector control cells (Emp), or in LPL knock-down cells (LPL KD) versus 202 control cells (202 Control).

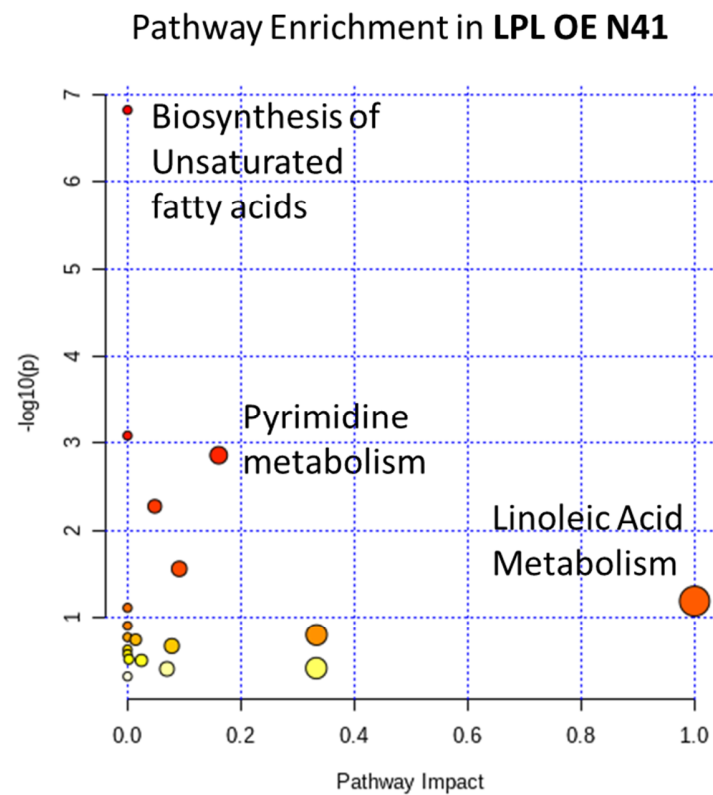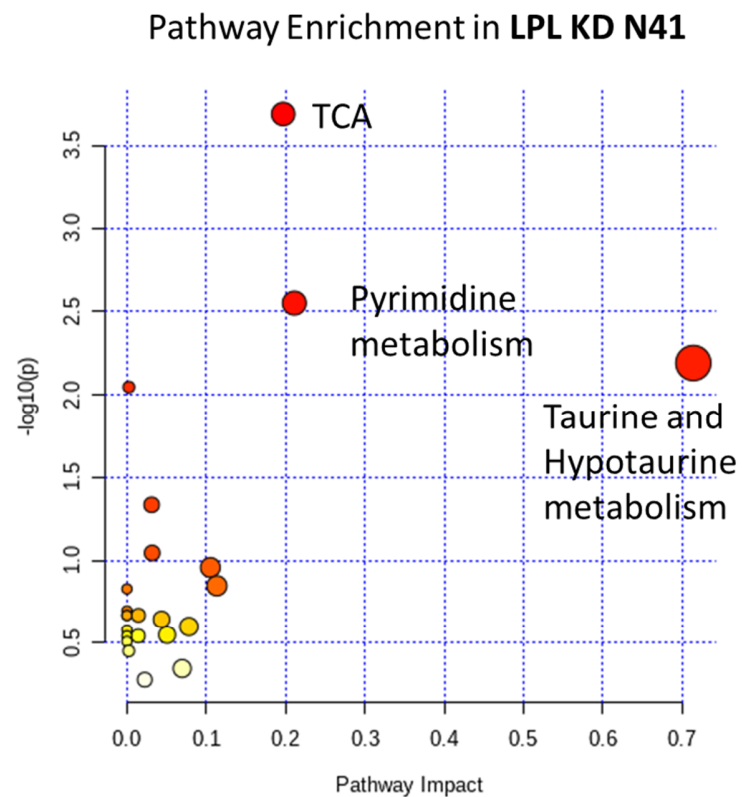

**Supplemental Figure 4.** Pathway enrichment analysis (MetaboAnalyst) of positively regulated metabolites in immortalized hypothalamic neurons either over expressing lipoprotein Lipase (LPL) (LPL OE), or with depleted LPL (LPL KD).

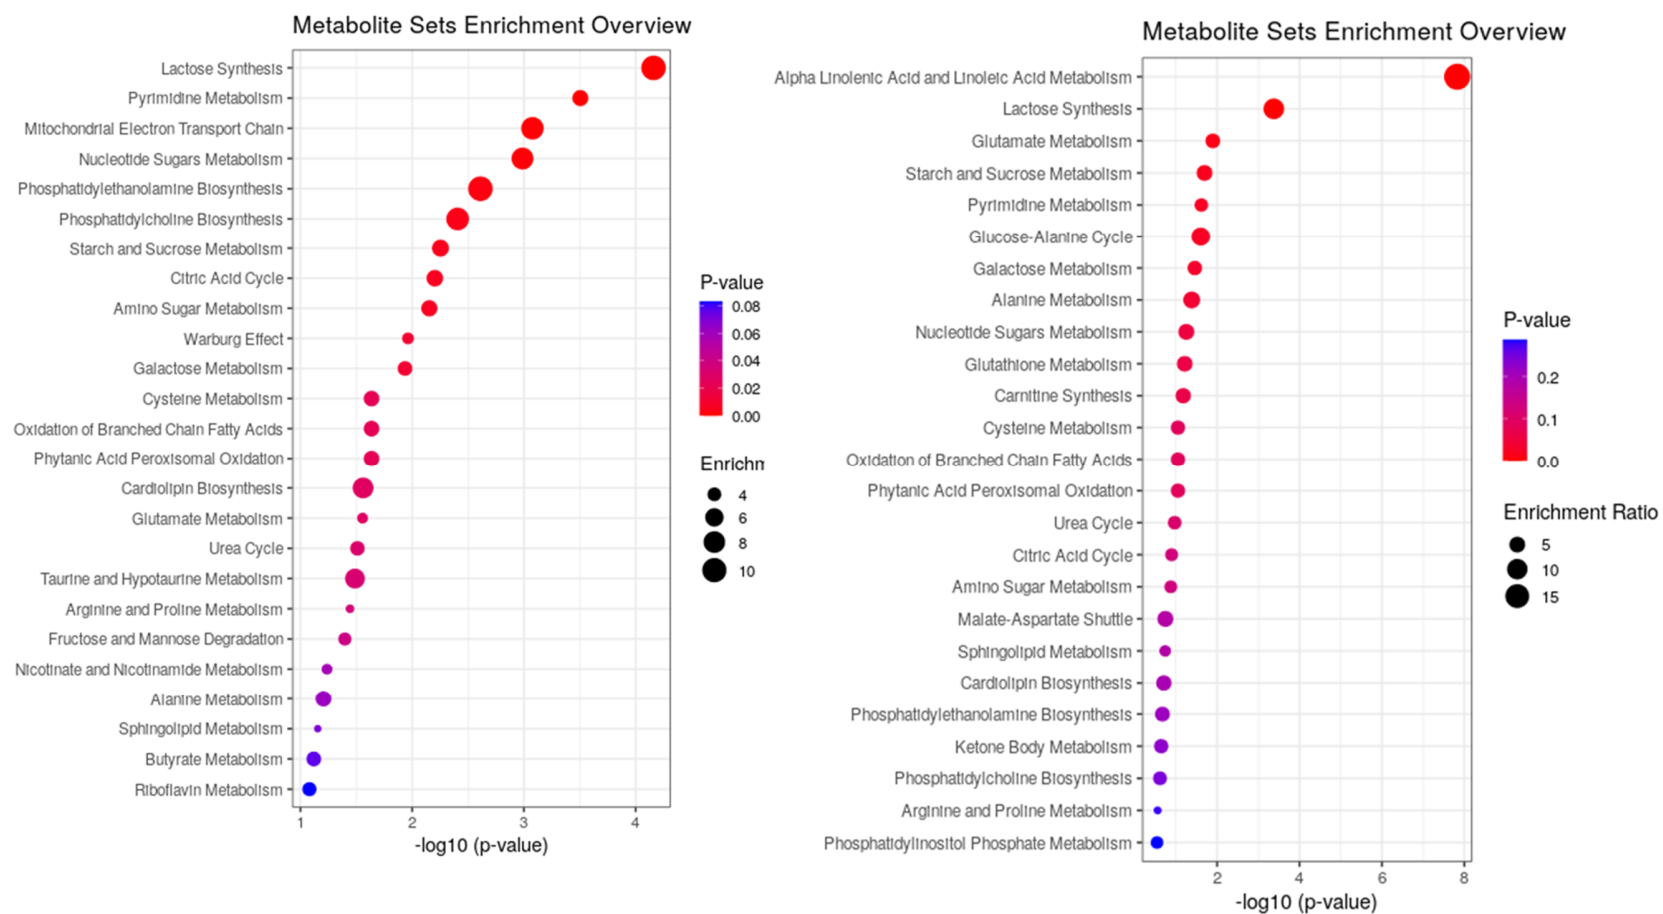

**Supplemental Figure 5.** Metabolite Set Enrichment analysis (MetaboAnalyst) of positively regulated metabolites in immortalized hypothalamic neurons either over expressing lipoprotein Lipase (LPL) (LPL OE), or in LPL knock-down cells (LPL KD).

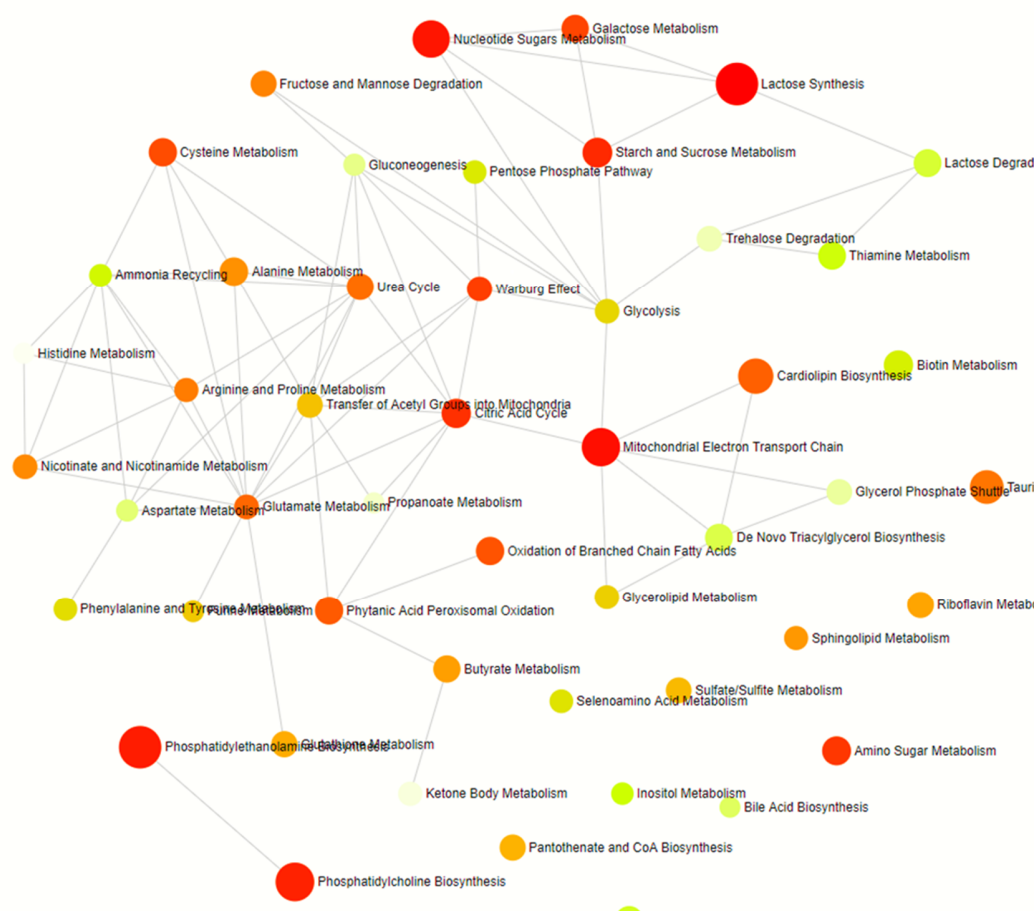

**Supplemental Figure 6.** Metabolite Set Enrichment map (MetaboAnalyst) of positively regulated metabolites in immortalized hypothalamic LPL knock-down cells (LPL KD).
